# Supplementary material for: Iodine assisted modified Suzuki type reaction of bicyclic hydrazines: stereoselective synthesis of functionalized cyclopentenes
Source: Royal Society of Chemistry journal article supplement (doi:10.1039/b607389a), 2006-01-01
Supplement: b607389a3.pdf [file b607389a3.pdf]

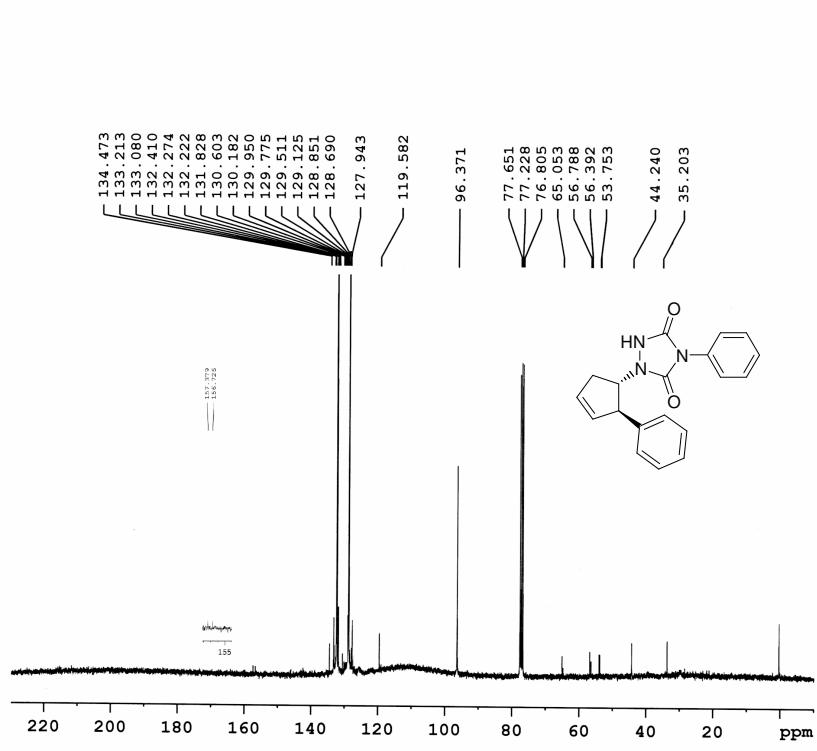

Current Data Parameters  
 NAME Thirumalai13C  
 EXPNO 3  
 PROCNO 1

F2 - Acquisition Parameters  
 Date\_ 20060228  
 Time 10.12  
 INSTRUM spect  
 PROBHD 5 mm Dual 13C/  
 PULPROG zgdc  
 TD 32768  
 SOLVENT CDCl3  
 NS 14265  
 DS 0  
 SWH 18115.941 Hz  
 FIDRES 0.552855 Hz  
 AQ 0.9044468 sec  
 RG 8192  
 DW 27.600 usec  
 DE 9.00 usec  
 TE 0.0 K  
 D1 3.0000000 sec  
 d11 0.0300000 sec  
 MCREST 0.0000000 sec  
 MCWRK 0.0150000 sec

===== CHANNEL f1 =====  
 NUC1 13C  
 P1 12.50 usec  
 PL1 -6.00 dB  
 SFO1 75.4760204 MHz

===== CHANNEL f2 =====  
 CPDPRG2 waltz16  
 NUC2 1H  
 PCPD2 80.00 usec  
 PL2 120.00 dB  
 PL12 17.23 dB  
 SFO2 300.1312005 MHz

F2 - Processing parameters  
 SI 32768  
 SF 75.4677313 MHz  
 WDW EM  
 SSB 0  
 LB 1.00 Hz  
 GB 0  
 PC 1.50

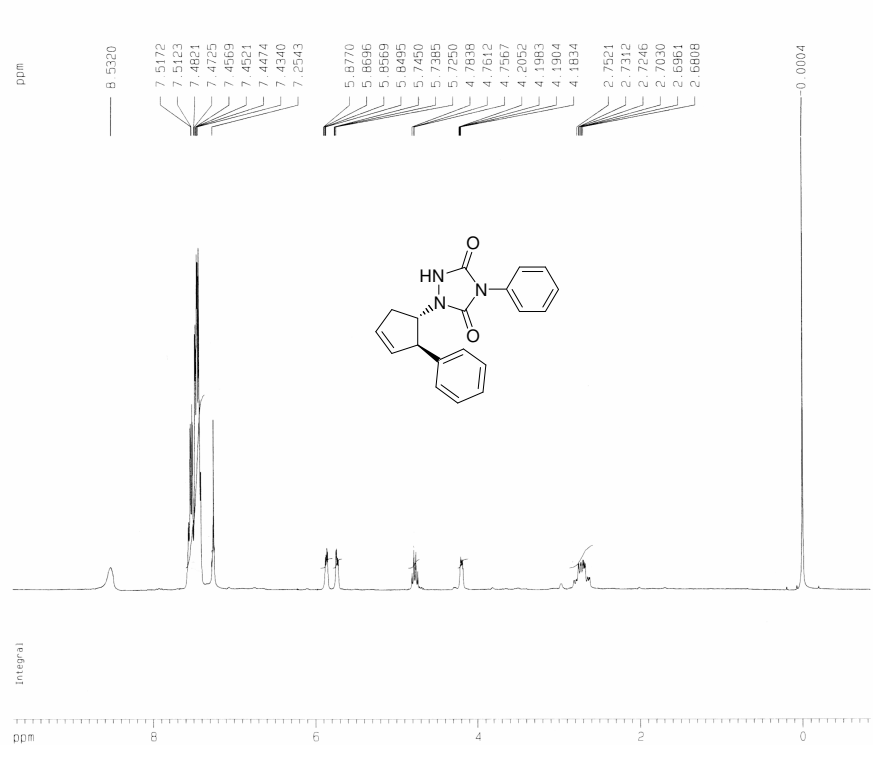

Current Data Parameters  
 NAME saumini  
 EXPNO 3  
 PROCNO 1

F2 - Acquisition Parameters  
 Date\_ 20060207  
 Time 11.17  
 INSTRUM spect  
 PROBHD 5 mm Dual 13C/  
 PULPROG zg30  
 TD 22468  
 SOLVENT CDCl3  
 NS 8  
 DS 2  
 SWH 7812.500 Hz  
 FIDRES 0.347717 Hz  
 AQ 1.4380020 sec  
 RG 181  
 DW 64.000 usec  
 DE 5.00 usec  
 TE 0.0 K  
 D1 1.0000000 sec  
 MCREST 0.0000000 sec  
 MCWRK 0.0150000 sec

===== CHANNEL f1 =====  
 NUC1 1H  
 P1 11.00 usec  
 PL1 0.00 dB  
 SFO1 300.1318008 MHz

F2 - Processing parameters  
 SI 32768  
 SF 300.1300079 MHz  
 WDW EM  
 SSB 0  
 LB 0.30 Hz  
 GB 0  
 PC 1.40

ID NMR plot parameters  
 CX 20.00 cm  
 CY 0.00 cm  
 F1P 9.750 ppm  
 F1 2926.33 Hz  
 F2P -0.837 ppm  
 F2 -251.30 Hz  
 PPMCH 0.52937 ppm/cm  
 HZCM 158.88116 Hz/cm

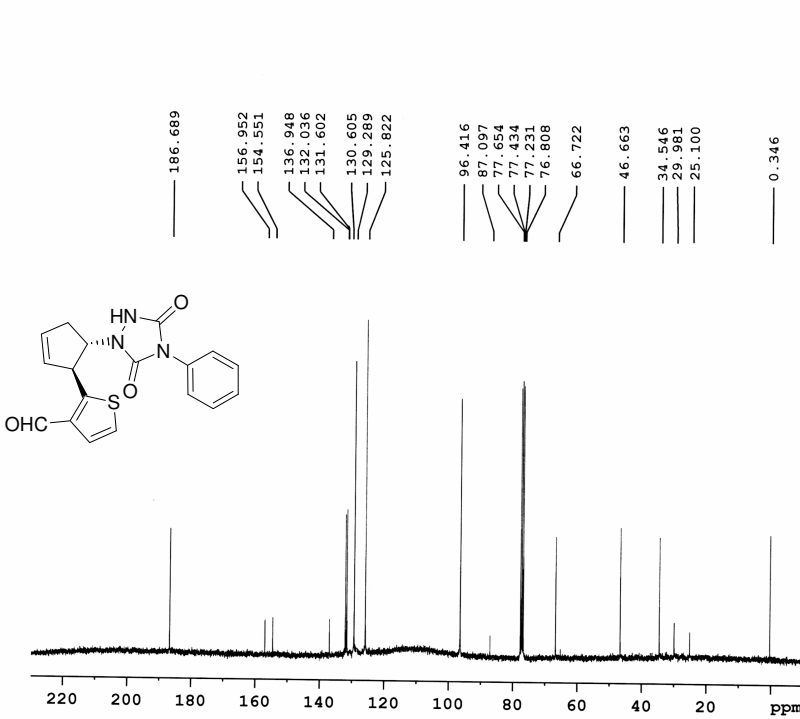

```

Current Data Parameters
NAME      Thirumalai13C
EXPNO     3
PROCNO    1

F2 - Acquisition Parameters
Date_     20060303
Time      9.46
INSTRUM   spect
PROBHD    5 mm Dual 13C/
PULPROG   zgdc
TD         32768
SOLVENT   CDCl3
NS         11969
DS         0
SWH        18115.941 Hz
FIDRES     0.552855 Hz
AQ         0.9044468 sec
RG         4597.6
DW         27.600 usec
DE         9.00 usec
TE         0.0 K
D1         3.0000000 sec
d11        0.0300000 sec
MCREST     0.0000000 sec
MCWRK     0.0150000 sec

===== CHANNEL f1 =====
NUC1      13C
P1        12.50 usec
PL1       -6.00 dB
SFO1      75.4760204 MHz

===== CHANNEL f2 =====
CPDPRG2   waltz16
NUC2      1H
PCPD2     80.00 usec
PL2       120.00 dB
PL12      17.23 dB
SFO2      300.1312005 MHz

F2 - Processing parameters
SI         32768
SF         75.4677291 MHz
WDW        EM
SSB        0
LB         1.00 Hz
GB         0
PC         1.20
    
```

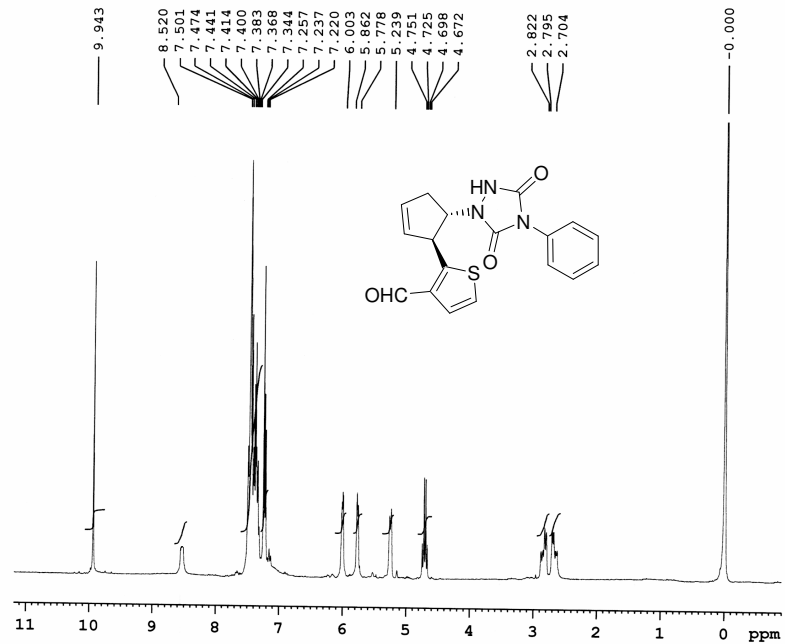

```

Current Data Parameters
NAME      Thirumalai
EXPNO     1
PROCNO    1

F2 - Acquisition Parameters
Date_     20060228
Time      12.58
INSTRUM   spect
PROBHD    5 mm Dual 13C/
PULPROG   zg30
TD         22468
SOLVENT   CDCl3
NS         8
DS         2
SWH        4194.631 Hz
FIDRES     0.186694 Hz
AQ         2.6782355 sec
RG         161.3
DW         119.200 usec
DE         6.00 usec
TE         0.0 K
D1         1.0000000 sec
MCREST     0.0000000 sec
MCWRK     0.0150000 sec

===== CHANNEL f1 =====
NUC1      1H
P1        11.00 usec
PL1       0.00 dB
SFO1      300.1316507 MHz

F2 - Processing parameters
SI         32768
SF         300.1300078 MHz
WDW        EM
SSB        0
LB         0.30 Hz
GB         0
PC         30.00
    
```

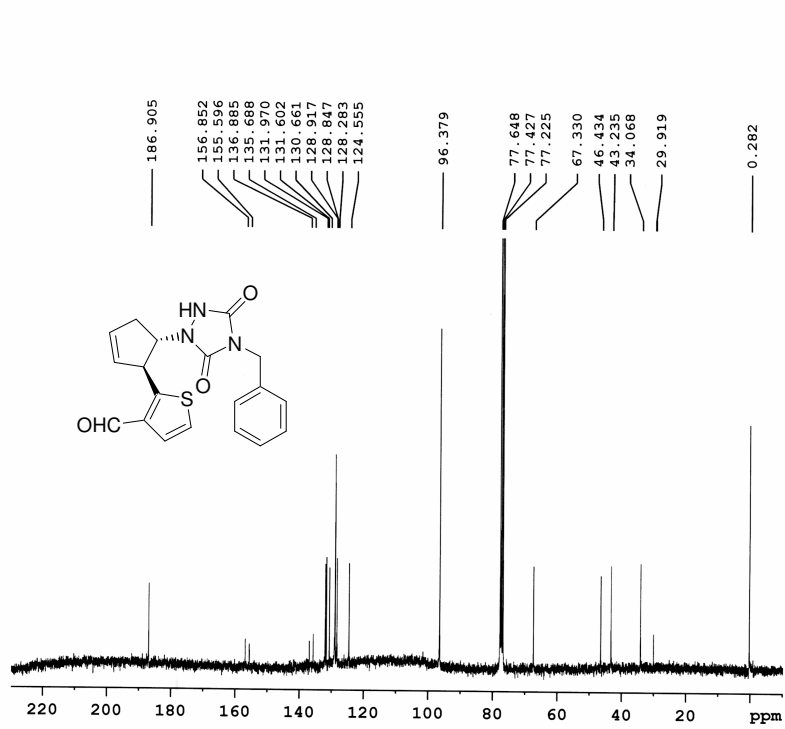

Current Data Parameters  
 NAME Thirumalai13C  
 EXPNO 3  
 PROCNO 1

F2 - Acquisition Parameters  
 Date\_ 20060224  
 Time 9.28  
 INSTRUM spect  
 PROBHD 5 mm Dual 13C/  
 PULPROG zgdc  
 TD 32768  
 SOLVENT CDC13  
 NS 10792  
 DS 0  
 SWH 18115.941 Hz  
 FIDRES 0.552855 Hz  
 AQ 0.9044468 sec  
 RG 1448.2  
 DW 27.600 usec  
 DE 9.00 usec  
 TE 0.0 K  
 D1 3.00000000 sec  
 d11 0.03000000 sec  
 MCREST 0.00000000 sec  
 MCWRK 0.01500000 sec

==== CHANNEL f1 =====  
 NUC1 13C  
 P1 12.50 usec  
 PL1 -6.00 dB  
 SFO1 75.4760204 MHz

==== CHANNEL f2 =====  
 CPDPRG2 waltz16  
 NUC2 1H  
 PCPD2 80.00 usec  
 PL2 120.00 dB  
 PL12 17.23 dB  
 SFO2 300.1312005 MHz

F2 - Processing parameters  
 SI 32768  
 SF 75.4677307 MHz  
 WDW EM  
 SSB 0  
 LB 1.00 Hz  
 GB 0  
 PC 1.50

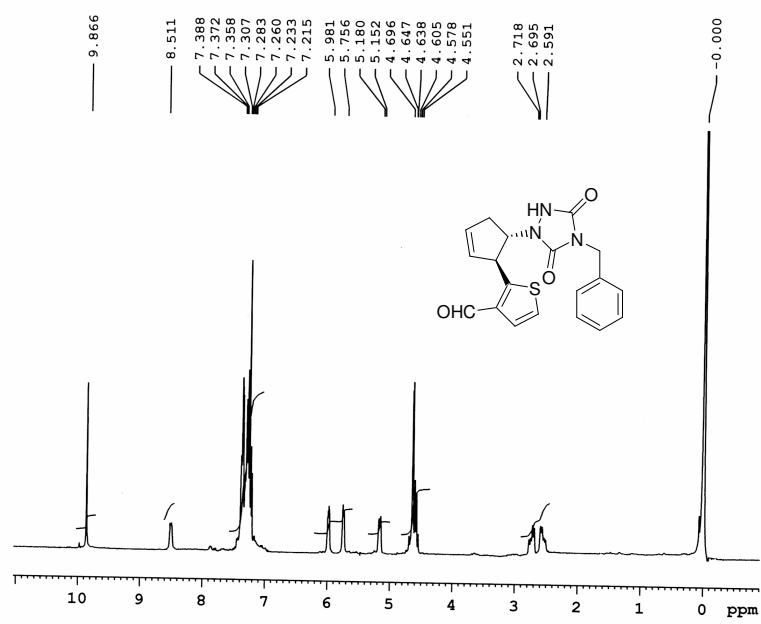

Current Data Parameters  
 NAME Thirumalai  
 EXPNO 1  
 PROCNO 1

F2 - Acquisition Parameters  
 Date\_ 20060221  
 Time 15.08  
 INSTRUM spect  
 PROBHD 5 mm Dual 13C/  
 PULPROG zg30  
 TD 22468  
 SOLVENT CDC13  
 NS 8  
 DS 2  
 SWH 4194.631 Hz  
 FIDRES 0.186694 Hz  
 AQ 2.6782355 sec  
 RG 362  
 DW 119.200 usec  
 DE 6.00 usec  
 TE 0.0 K  
 D1 1.00000000 sec  
 MCREST 0.00000000 sec  
 MCWRK 0.01500000 sec

==== CHANNEL f1 =====  
 NUC1 1H  
 P1 11.00 usec  
 PL1 0.00 dB  
 SFO1 300.1316507 MHz

F2 - Processing parameters  
 SI 32768  
 SF 300.1300069 MHz  
 WDW EM  
 SSB 0  
 LB 0.30 Hz  
 GB 0  
 PC 10.00

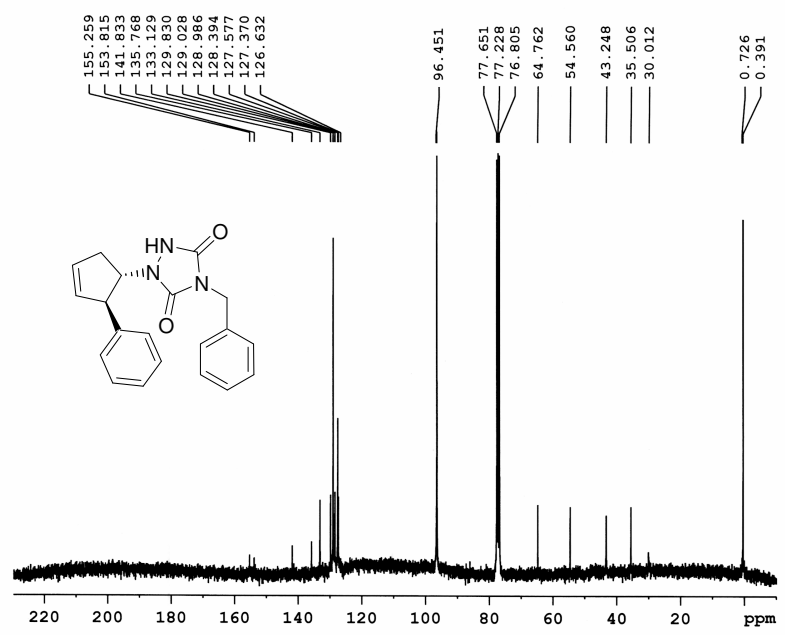

Current Data Parameters  
 NAME saumini13C  
 EXPNO 3  
 PROCNO 1

F2 - Acquisition Parameters  
 Date\_ 20060219  
 Time 12.26  
 INSTRUM spect  
 PROBHD 5 mm Dual 13C/  
 PULPROG zgdc  
 TD 32768  
 SOLVENT CDCl3  
 NS 12035  
 DS 0  
 SWH 18115.941 Hz  
 FIDRES 0.552855 Hz  
 AQ 0.9044468 sec  
 RG 2896.3  
 DW 27.600 usec  
 DE 9.00 usec  
 TE 0.0 K  
 D1 5.00000000 sec  
 d11 0.03000000 sec  
 MCREST 0.00000000 sec  
 MCWRK 0.01500000 sec

===== CHANNEL f1 =====  
 NUC1 13C  
 P1 12.50 usec  
 PL1 -6.00 dB  
 SFO1 75.4760204 MHz

===== CHANNEL f2 =====  
 CPDPRG2 waltz16  
 NUC2 1H  
 PCPD2 80.00 usec  
 PL2 120.00 dB  
 PL12 17.23 dB  
 SFO2 300.1312005 MHz

F2 - Processing parameters  
 SI 32768  
 SF 75.4677269 MHz  
 WDW EM  
 SSB 0  
 LB 1.00 Hz  
 GB 0  
 PC 1.10

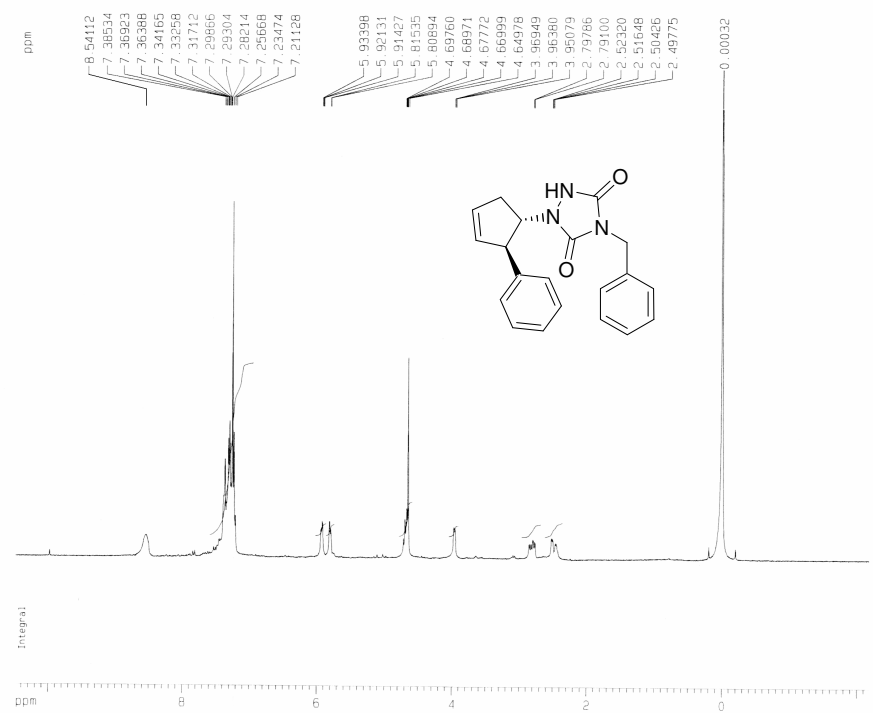

Current Data Parameters  
 NAME saumini  
 EXPNO 3  
 PROCNO 1

F2 - Acquisition Parameters  
 Date\_ 20060202  
 Time 19.16  
 INSTRUM spect  
 PROBHD 5 mm Dual 13C/  
 PULPROG zg30  
 TD 22468  
 SOLVENT CDCl3  
 NS 8  
 DS 2  
 SWH 7812.500 Hz  
 FIDRES 0.347717 Hz  
 AQ 1.4380020 sec  
 RG 322.5  
 DW 64.000 usec  
 DE 6.00 usec  
 TE 0.0 K  
 D1 1.00000000 sec  
 MCREST 0.00000000 sec  
 MCWRK 0.01500000 sec

===== CHANNEL f1 =====  
 NUC1 1H  
 P1 11.00 usec  
 PL1 0.00 dB  
 SFO1 300.1318008 MHz

F2 - Processing parameters  
 SI 32768  
 SF 300.1300072 MHz  
 WDW EM  
 SSB 0  
 LB 0.30 Hz  
 GB 0  
 PC 1.40

1D NMR plot parameters  
 CX 20.00 cm  
 CY 0.00 cm  
 F1P 10.485 ppm  
 F1 3146.89 Hz  
 F2P -2.178 ppm  
 F2 -653.78 Hz  
 BRMC 0.63317 ppm/cm  
 HZCM 190.03378 Hz/cm
